# Supplementary material
Source: HighWire-hosted journal article supplement (https://drc.bmj.com/content/9/1/e001776)

**Supplemental Figure 4. Cardiovascular Events**

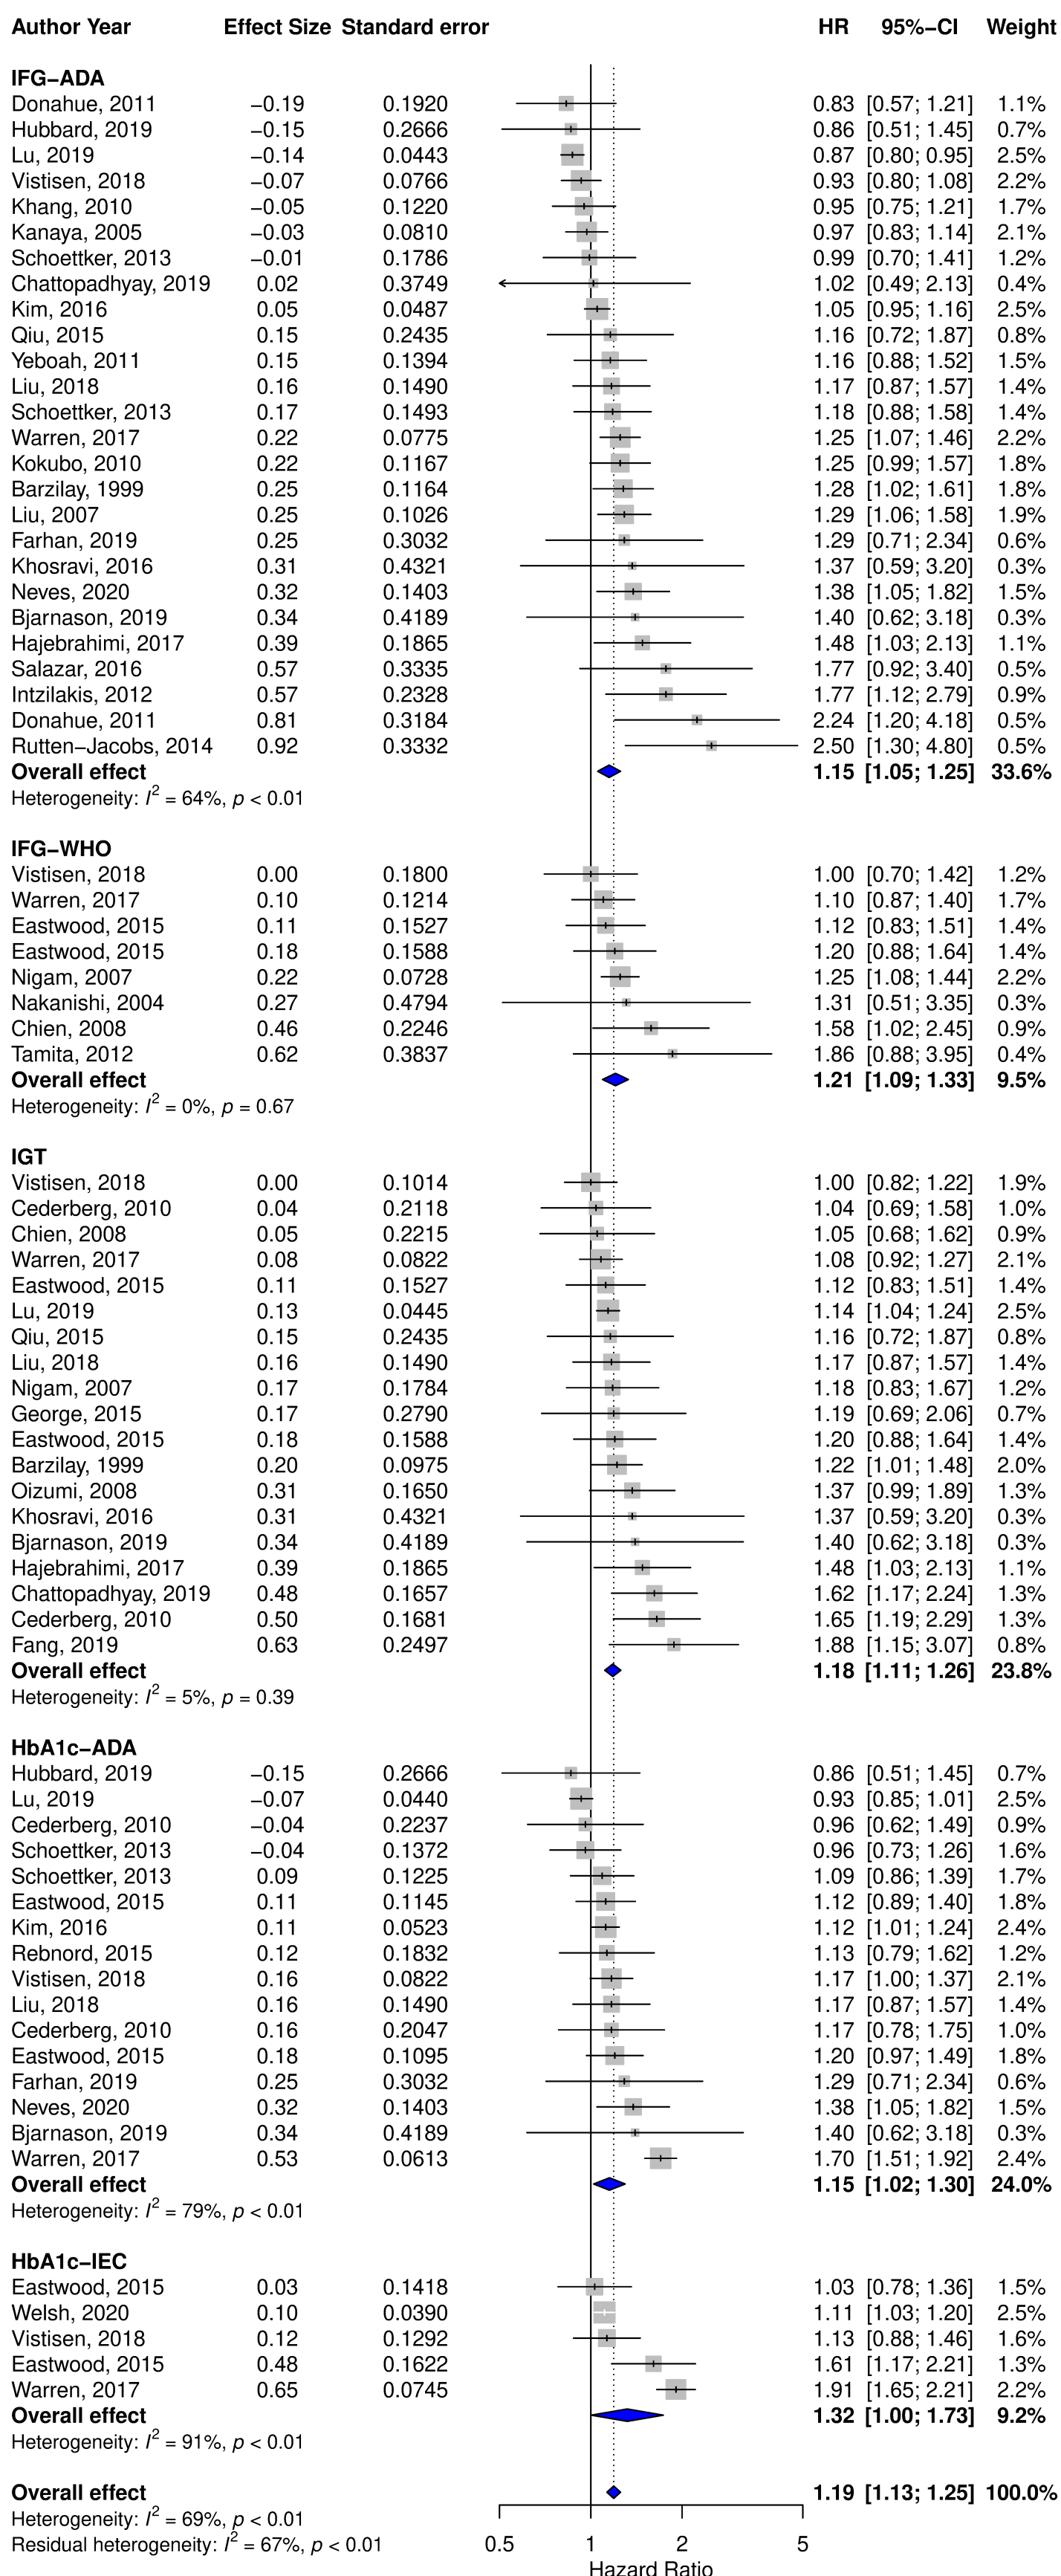

Supplement: inline-supplementary-material-14 [file inline-supplementary-material-14.pdf]

**Supplemental Figure 14****Funnel Plot: Heart Failure Events**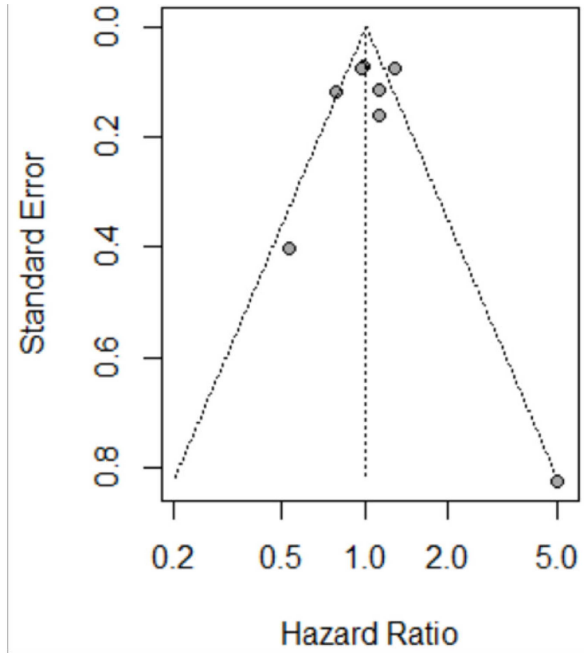

Supplement: inline-supplementary-material-15 [file inline-supplementary-material-15.pdf]

**Supplemental Figure 11****Funnel Plot: Cardiovascular Events**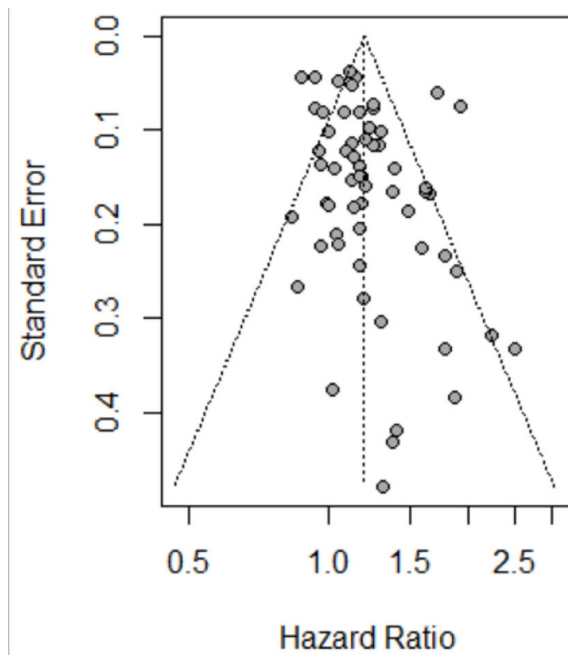

Supplement: inline-supplementary-material-16 [file inline-supplementary-material-16.pdf]

**Supplemental Figure 5. Stroke Events**

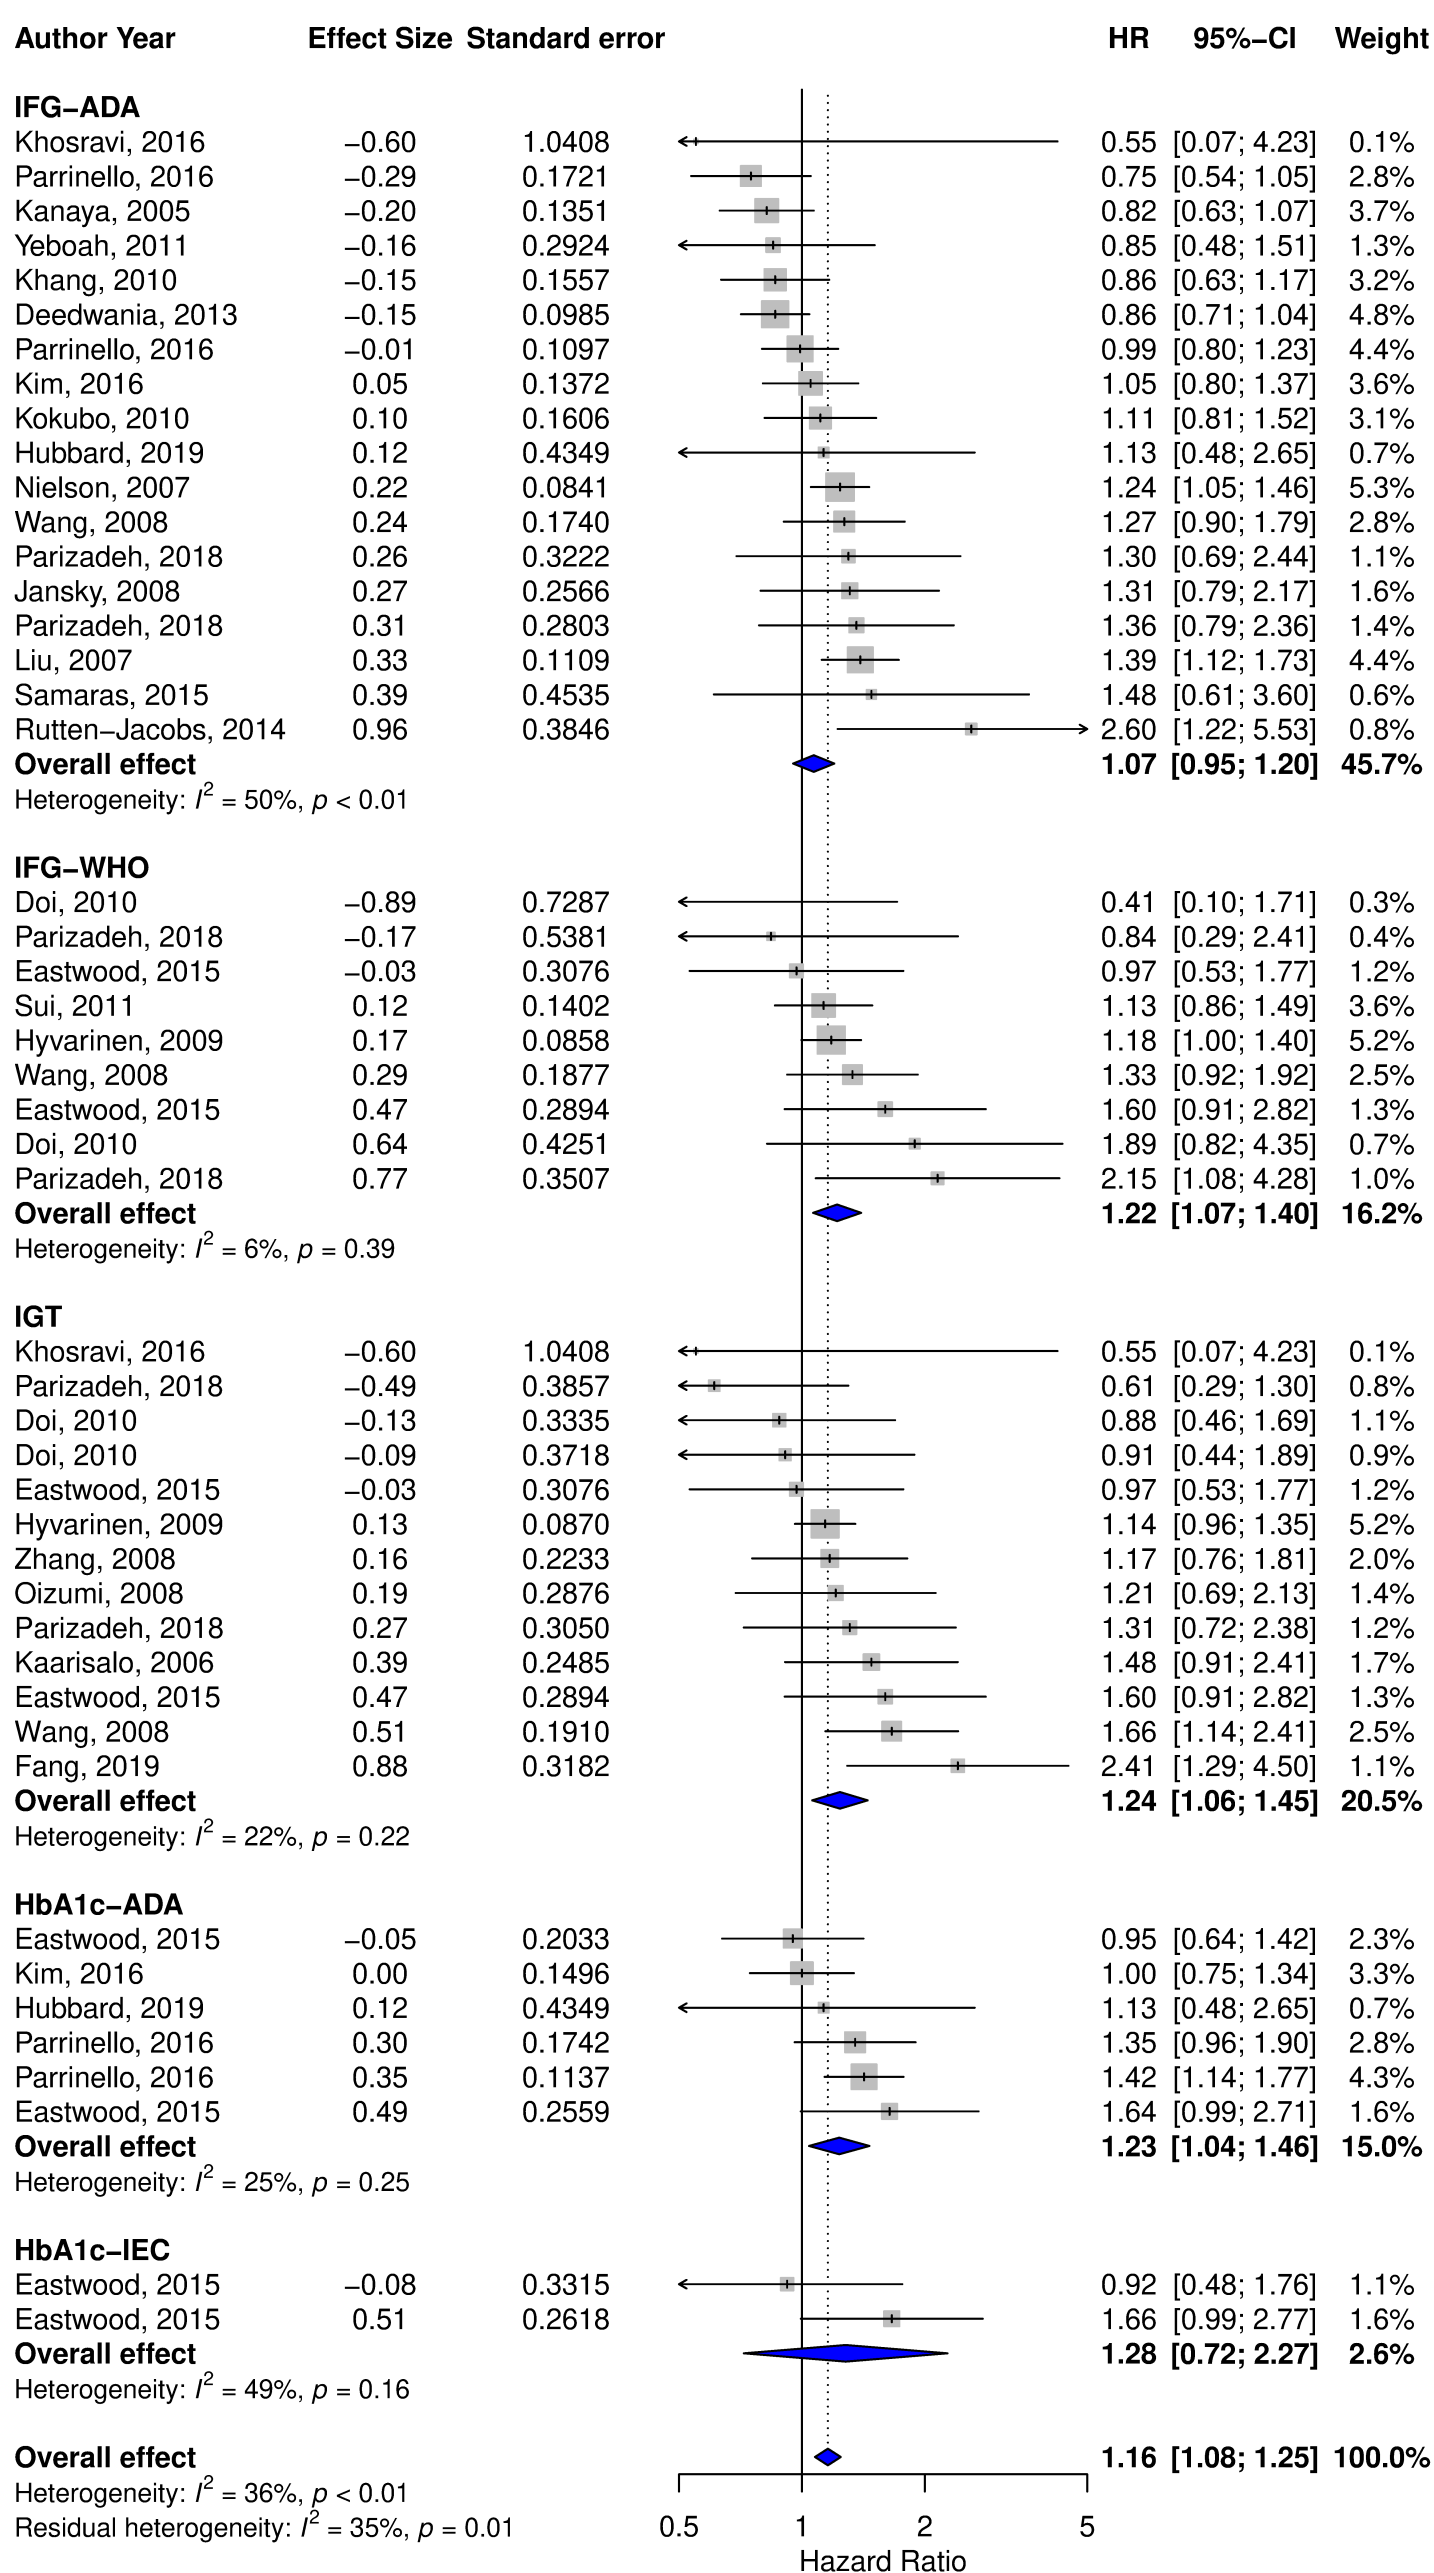

Supplement: inline-supplementary-material-18 [file inline-supplementary-material-18.pdf]
